# Supplementary material for: Proof of concept for multiple nerve transfers to a single target muscle
Source: eLife. 2021 Oct 1;10:e71312. doi: 10.7554/eLife.71312 (PMC8530510; doi:10.7554/eLife.71312)
Supplement: Figure 4—source data 1. [file elife-71312-fig4-data1.xlsx]

## Sheet: Tabelle1
Treatment	labeled_neurons
SNT	38
SNT	34
SNT	44
SNT	38
SNT	34
SNT	38
SNT	61
SNT	76
SNT	71
SNT	36
SNT	46
SNT	52
SNT	78
SNT	65
SNT	49
DNT	55
DNT	120
DNT	76
DNT	56
DNT	39
DNT	63
DNT	73
DNT	83
DNT	93
DNT	56
DNT	100
DNT	93
DNT	109
DNT	49
DNT	136
Control	67
Control	68
Control	66
Control	66
Control	65
Control	72
Control	66
