# Supplementary material for: Proof of concept for multiple nerve transfers to a single target muscle
Source: eLife. 2021 Oct 1;10:e71312. doi: 10.7554/eLife.71312 (PMC8530510; doi:10.7554/eLife.71312)
Supplement: Figure 5—source data 1. [file elife-71312-fig5-data1.xlsx]

## Sheet: Tabelle1
Subject	Treatment	Control (mg)	Treated (mg)
1	SNT	317.40	270.00
2	SNT	246.50	210.80
3	SNT	331.40	235.60
4	SNT	314.50	236.20
5	SNT	302.60	247.30
6	SNT	300.10	235.10
7	SNT	278.30	210.00
8	SNT	363.80	279.80
9	SNT	220.80	145.10
10	SNT	288.40	285.80
11	SNT	317.40	289.50
12	SNT	284.10	142.50
13	SNT	265.20	243.80
14	SNT	269.20	248.40
15	SNT	294.30	246.10
16	DNT	353.10	371.80
17	DNT	359.70	386.70
18	DNT	298.20	333.30
19	DNT	335.40	330.30
20	DNT	365.50	321.20
21	DNT	273.00	306.80
22	DNT	264.80	260.90
23	DNT	298.60	269.50
24	DNT	306.30	309.30
25	DNT	304.40	275.70
26	DNT	338.00	344.90
27	DNT	300.80	295.20
28	DNT	298.50	271.00
29	DNT	321.20	276.20
30	DNT	305.10	280.90
31	DNT	323.50	323.40
32	DNT	325.30	351.60
